# Supplementary material for: A comparison of Illumina and Ion Torrent sequencing platforms in the context of differential gene expression
Source: PubMed Central journal article supplement (PMC5553782; doi:10.1186/s12864-017-4011-0), 2017-08-10

# Ion Torrent read length distribution

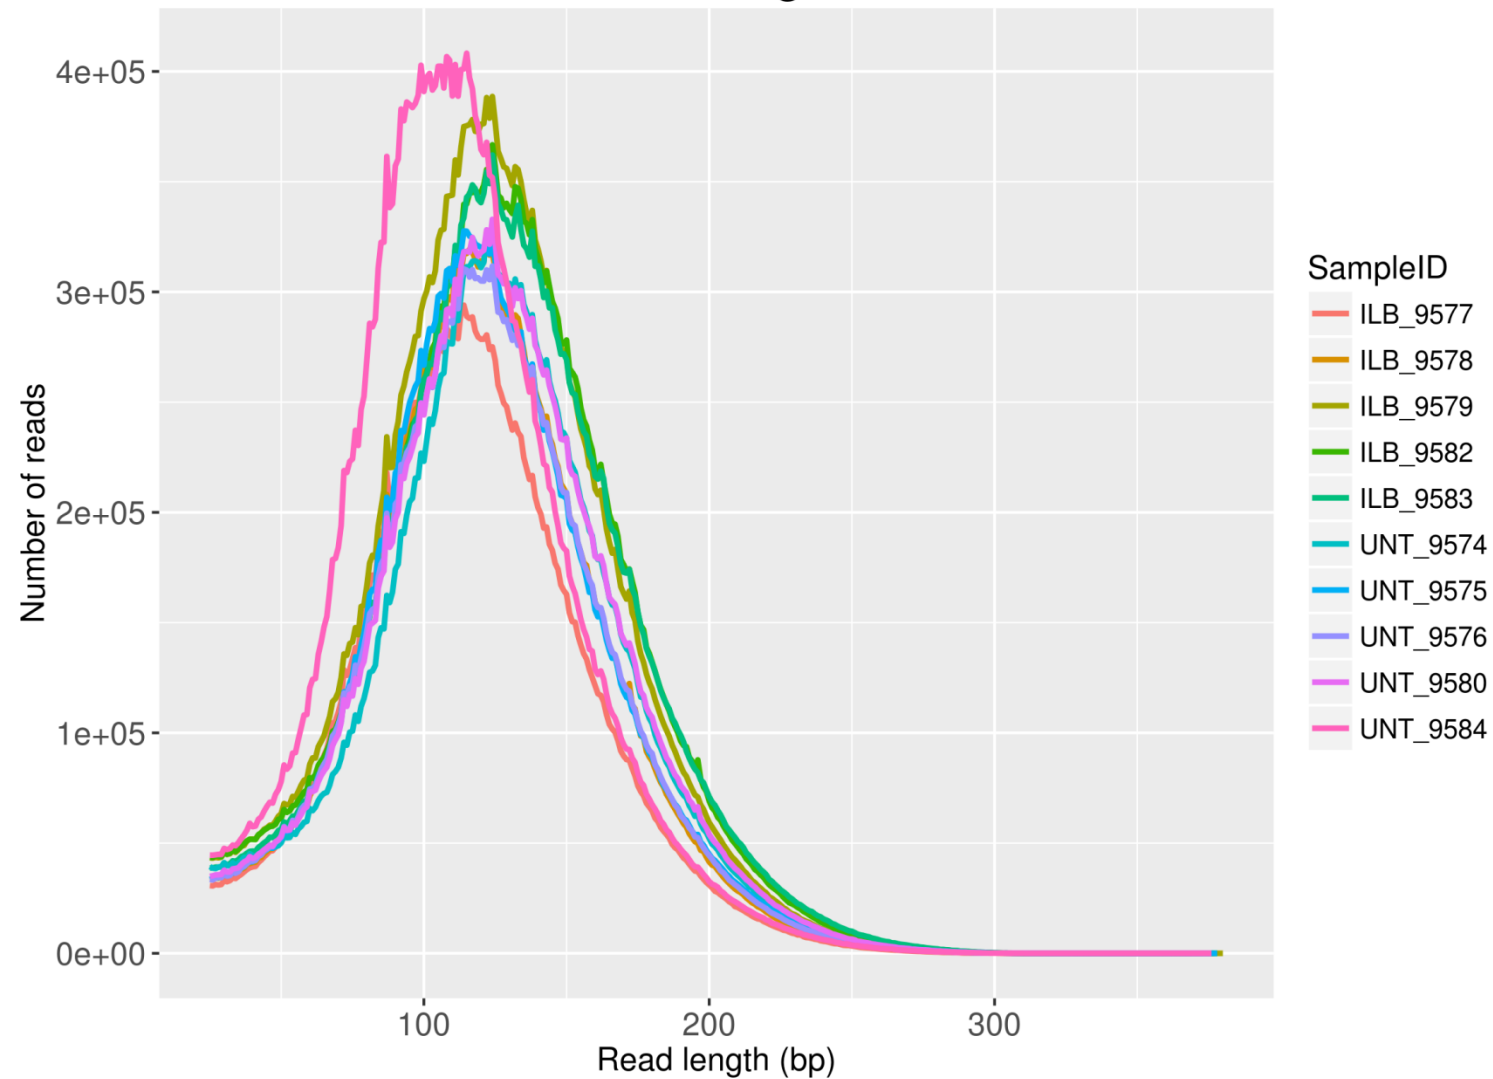

Supplement: 12864_2017_4011_MOESM4_ESM.pdf [file 12864_2017_4011_MOESM4_ESM.pdf]
