# Supplementary material for: A comparison of Illumina and Ion Torrent sequencing platforms in the context of differential gene expression
Source: PubMed Central journal article supplement (PMC5553782; doi:10.1186/s12864-017-4011-0), 2017-08-10

# Read count comparison

GSNAP

STAR

STAR + Bowtie2

ILB\_9577

ILB\_9578

ILB\_9579

ILB\_9582

ILB\_9583

UNT\_9574

UNT\_9575

UNT\_9576

UNT\_9580

UNT\_9584

Ion Torrent (log<sub>10</sub> read counts)

Illumina (log<sub>10</sub> read counts)

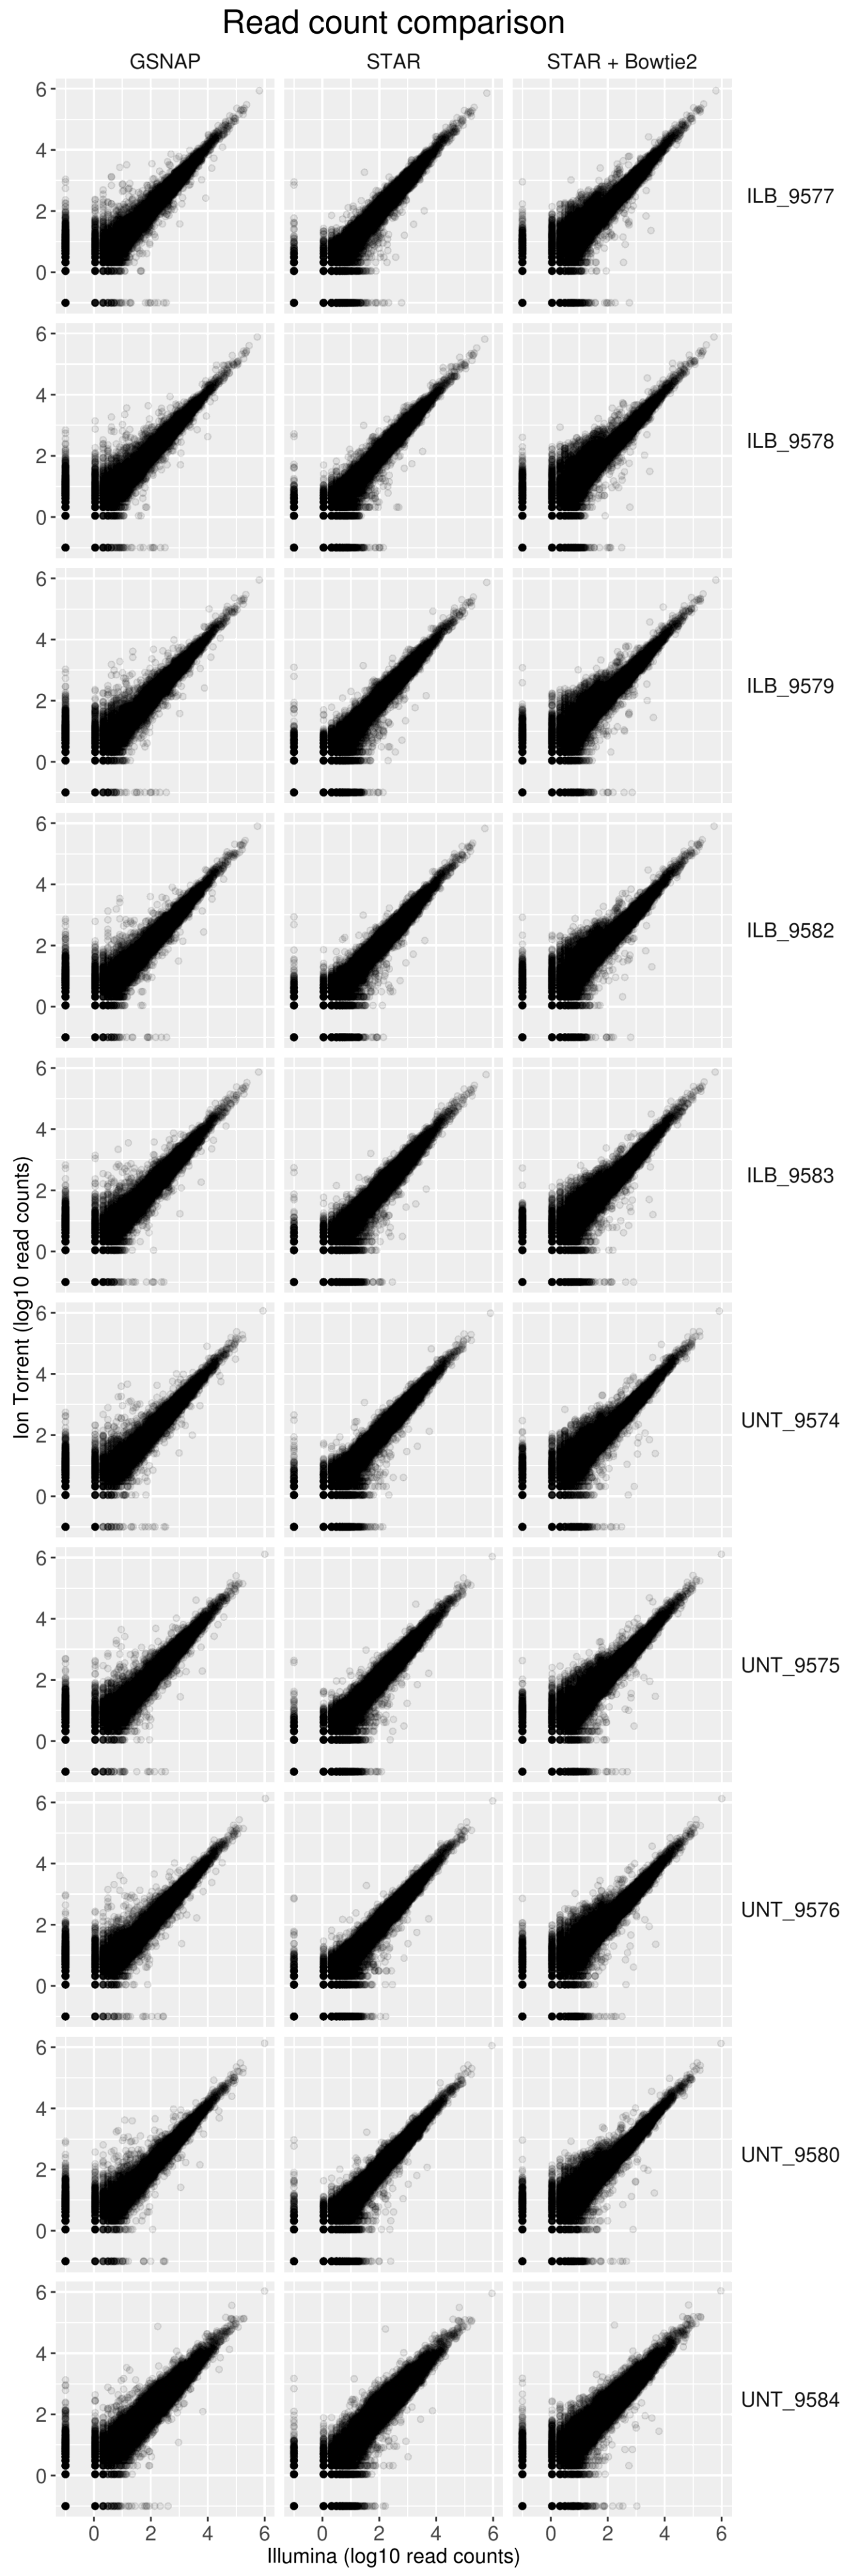

Supplement: 12864_2017_4011_MOESM6_ESM.pdf [file 12864_2017_4011_MOESM6_ESM.pdf]
